# Supplementary material for: 3D-Printed Biomaterial Testing in Response to Cryoablation: Implications for Surgical Ventricular Tachycardia Ablation
Source: MDPI journal article supplement (doi:10.3390/jcm12031036), 2023-01-29
Supplement: s1 [file s1]

## 3D-Printed Biomaterials Testing in Response to Cryoablation

### SUPPLEMENTARY MATERIALS

**Supplementary Table S1.** Statistical analysis of temperatures means between control and PMS under the biomaterial samples in D<sub>1</sub>

| Distance       | Time | Biomaterial | Control mean (SD) | Biomaterial mean (SD) | pvalue |
|----------------|------|-------------|-------------------|-----------------------|--------|
| D <sub>1</sub> | 0 s  | Med_2.5 mm  | 8.3 (5.6)         | 0.6 (15.3)            | 0.382  |
|                | 10 s | Med_2.5 mm  | 8.2 (5.5)         | 4.9 (9.4)             | 0.568  |
|                | 15 s | Med_2.5 mm  | 7.9 (5.0)         | 5.2 (8.3)             | 0.590  |
|                | 30 s | Med_2.5 mm  | 8.0 (4.2)         | 7.0 (8.9)             | 0.834  |
|                | 0 s  | Med_1.0 mm  | 8.3 (5.6)         | -0.8 (15.5)           | 0.308  |
|                | 10 s | Med_1.0 mm  | 8.2 (5.5)         | 3.9 (8.5)             | 0.437  |
|                | 15 s | Med_1.0 mm  | 7.9 (5.0)         | 4.4 (8.1)             | 0.491  |
|                | 30 s | Med_1.0 mm  | 8.0 (4.2)         | 5.0 (7.9)             | 0.526  |

|  |             |                   |           |            |       |
|--|-------------|-------------------|-----------|------------|-------|
|  | <b>0 s</b>  | <b>Tpu_2.5 mm</b> | 8.3 (5.6) | 1.3 (10.5) | 0.285 |
|  | <b>10 s</b> | <b>Tpu_2.5 mm</b> | 8.2 (5.5) | 3.5 (7.5)  | 0.352 |
|  | <b>15 s</b> | <b>Tpu_2.5 mm</b> | 7.9 (5.0) | 4.2 (6.8)  | 0.415 |
|  | <b>30 s</b> | <b>Tpu_2.5 mm</b> | 8.0 (4.2) | 5.1 (6.8)  | 0.488 |
|  | <b>0 s</b>  | <b>Tpu_1.0 mm</b> | 8.3 (5.6) | 6.1 (10.7) | 0.735 |
|  | <b>10 s</b> | <b>Tpu_1.0 mm</b> | 8.2 (5.5) | 6.7 (9.5)  | 0.800 |
|  | <b>15 s</b> | <b>Tpu_1.0 mm</b> | 7.9 (5.0) | 7.1 (8.7)  | 0.878 |
|  | <b>30 s</b> | <b>Tpu_1.0 mm</b> | 8.0 (4.2) | 7.3 (8.1)  | 0.883 |

For the p-value computation different thicknesses of biomaterials have been considered. The SD is the standard deviation of temperature measurements.

**Supplementary Table S2.** Statistical analysis of temperatures means between control and PMS under the biomaterial samples in D<sub>2</sub>

| Distance       | Time | Biomaterial | Control mean (SD) | Biomaterial mean (SD) | pvalue |
|----------------|------|-------------|-------------------|-----------------------|--------|
| D <sub>2</sub> | 0 s  | Med_2.5 mm  | 21.9 (3.8)        | 23.7 (5.1)            | 0.594  |
|                | 10 s | Med_2.5 mm  | 21.6 (3.4)        | 23.4 (5.1)            | 0.580  |
|                | 15 s | Med_2.5 mm  | 21.6 (3.3)        | 23.1 (5.2)            | 0.628  |
|                | 30 s | Med_2.5 mm  | 21.2 (3.2)        | 22.8 (5.3)            | 0.629  |
|                | 0 s  | Med_1.0 mm  | 21.9 (3.8)        | 23.1 (5.9)            | 0.743  |
|                | 10 s | Med_1.0 mm  | 21.6 (3.4)        | 22.7 (6.0)            | 0.755  |
|                | 15 s | Med_1.0 mm  | 21.6 (3.3)        | 22.6 (6.0)            | 0.780  |
|                | 30 s | Med_1.0 mm  | 21.2 (3.2)        | 21.9 (5.9)            | 0.843  |
|                | 0 s  | Tpu_2.5 mm  | 21.9 (3.8)        | 23.8 (3.5)            | 0.495  |
|                | 10 s | Tpu_2.5 mm  | 21.6 (3.4)        | 23.6 (3.5)            | 0.451  |

|  |             |                   |            |            |       |
|--|-------------|-------------------|------------|------------|-------|
|  | <b>15 s</b> | <b>Tpu_2.5 mm</b> | 21.6 (3.3) | 23.4 (3.5) | 0.477 |
|  | <b>30 s</b> | <b>Tpu_2.5 mm</b> | 21.2 (3.2) | 22.8 (3.5) | 0.529 |
|  | <b>0 s</b>  | <b>Tpu_1.0 mm</b> | 21.9 (3.8) | 26.0 (2.9) | 0.137 |
|  | <b>10 s</b> | <b>Tpu_1.0 mm</b> | 21.6 (3.4) | 25.5 (3.2) | 0.145 |
|  | <b>15_s</b> | <b>Tpu_1.0 mm</b> | 21.6 (3.3) | 25.4 (3.1) | 0.142 |
|  | <b>30 s</b> | <b>Tpu_1.0 mm</b> | 21.2 (3.2) | 25.2 (2.9) | 0.117 |

For the p-value computation different thicknesses of biomaterials have been considered. The SD is the standard deviation of temperature measurements.
